# Supplementary material
Source: PubMed Central journal article supplement (PMC8607997)
Supplement: NIHMS1748427-supplement-Appendix_Material__Laitano_et_al_.pdf [file NIHMS1748427-supplement-Appendix_Material__Laitano_et_al_.pdf]

## **SUPPLEMENTARY MATERIAL**

**Laitano et al. Skeletal Muscle Interleukin-6 contributes to the innate immune response in septic mice**

**Table S1 Blood and Peritoneal Lavage Leukocyte Counts at 3 hours Post Cecal Slurry Injection.**

| Leukocytes                              | CRE       |            |         | skmIL-6   |            |         |
|-----------------------------------------|-----------|------------|---------|-----------|------------|---------|
|                                         | Vehicle   | Raloxifene | p-value | Vehicle   | Raloxifene | p-value |
| <b>FEMALE</b>                           |           |            |         |           |            |         |
| <b>Blood</b>                            |           |            |         |           |            |         |
| Total Leukocytes (x10 <sup>3</sup> /μL) | 1.75±1.09 | 1.92±1.05  | 0.73    | 2.14±1.37 | 1.83±0.49  | 0.48    |
| % Neutrophils                           | 44.3±11.7 | 51.2±7.9   | 0.14    | 44.7±8.0  | 44.8±5.7   | 0.99    |
| % Lymphocytes                           | 42.0±15.4 | 38.7±8.3   | 0.56    | 39.7±11.0 | 42.4±11.4  | 0.58    |
| % Basophils                             | 1.9±1.6   | 1.6±1.1    | 0.60    | 4.2±3.4   | 2.2±1.8    | 0.10    |
| % Eosinophils                           | 7.9±6.8   | 6.3±5.9    | 0.58    | 6.5±4.3   | 5.7±5.5    | 0.68    |
| % Monocytes                             | 3.9±2.1   | 5.2±2.3    | 0.22    | 4.9±4.1   | 5.0±3.5    | 0.94    |
| <b>Peritoneal Lavage</b>                |           |            |         |           |            |         |
| Total Leukocytes (x10 <sup>3</sup> /μL) | 1.1±0.5   | 1.2±0.4    | 0.47    | 1.64±0.6  | 1.8±0.6    | 0.47    |
| % Neutrophils                           | 38.1±14.5 | 37.5±8.6   | 0.90    | 37.6±5.9  | 43.0±14.3  | 0.29    |
| % Lymphocytes                           | 33.3±23   | 29.4±11.9  | 0.65    | 15.9±3.7  | 16.9±3.6   | 0.84    |
| % Basophils                             | 0.7±0.5   | 0.55±0.3   | 0.43    | 1.7±1.1   | 1.7±1.0    | 0.83    |
| % Eosinophils                           | 20.6±6.4  | 20.8±8.4   | 0.94    | 34.0±4.3  | 26.7±12.6  | 0.116   |
| % Monocytes                             | 7.5±1.9   | 10.9±1.7   | 0.19    | 11.6±4.3  | 10.8±2.5   | 0.64    |
| <b>MALE</b>                             |           |            |         |           |            |         |
| <b>Blood</b>                            |           |            |         |           |            |         |
| Total Leukocytes (x10 <sup>3</sup> /μL) | 3.2±1.2   | 2.7±0.8    | 0.33    | 3.38±1.2  | 2.89±1.0   | 0.31    |
| % Neutrophils                           | 56.5±13.8 | 61.1±8.5   | 0.39    | 59.6±4.7  | 56.7±5.5   | 0.20    |
| % Lymphocytes                           | 30.2±8.5  | 34.8±14.1  | 0.39    | 33.5±3.9  | 34.1±7.3   | 0.80    |
| % Basophils                             | 0.82±0.3  | 0.98±0.3   | 0.71    | 0.8±1.0   | 1.2±1.4    | 0.41    |
| % Eosinophils                           | 4.3±4.6   | 3.4±2.3    | 0.62    | 2.3±2.9   | 2.9±3.2    | 0.63    |
| % Monocytes                             | 4.5±0.5   | 3.5±1.4    | 0.17    | 3.9±1.7   | 5.0±1.6    | 0.12    |
| <b>Peritoneal Lavage</b>                |           |            |         |           |            |         |
| Total Leukocytes                        | 2.5±1.3   | 2.0±0.7    | 0.49    | 1.7±1.3   | 1.6±1.1    | 0.83    |
| % Neutrophils                           | 42.1±21.8 | 52.7±17.8  | 0.26    | 46.9±7.6  | 43.2±7.2   | 0.73    |
| % Lymphocytes                           | 39.7±7.0  | 23.4±6.6   | 0.11    | 23.7±20.2 | 13.4±10.5  | 0.21    |
| % Basophils                             | 0.4±0.3   | 0.4±0.2    | 0.48    | 1.0±0.6   | 1.5±0.6    | 0.57    |
| % Eosinophils                           | 14.5±4.4  | 10.9±3.7   | 0.07    | 23.3±5.1  | 23.3±5.1   | 0.97    |
| % Monocytes                             | 7.0±2.8   | 9.1±2.2    | 0.09    | 9.0±4.3   | 13.0±4.5   | 0.08    |

Mean +/- SD. p values T-tests within Strains, i.e. Cre only and SkmIL-6,

Vehicle vs. Ralox, n = 8-11 per group

**Table S2 – Circulatory cytokine/chemokine concentrations for Female mice at 3h post septic shock.**

| Cytokine/Chemokine (pg/ml) | CRE              |                  |         | skmIL-6     |             |         |
|----------------------------|------------------|------------------|---------|-------------|-------------|---------|
|                            | Vehicle          | Raloxifene       | p-value | Vehicle     | Raloxifene  | p-value |
| GM-CSF                     | 309±76           | 260 ± 110        | 0.284   | 164±70      | 130±52      | 0.214   |
| IFN-γ                      | 13±4             | 18 ± 9           | 0.186   | 13±5        | 12±4        | 0.845   |
| IL-1 α                     | 711±294          | 908 ± 656        | 0.420   | 821±466     | 664±346     | 0.380   |
| IL-1β                      | 145±89           | 128 ± 78         | 0.662   | 112±111     | 70±68       | 0.294   |
| IL-2                       | 41±23            | 54 ± 49          | 0.493   | 29±21       | 21±14       | 0.309   |
| IL-4                       | 10 ± 8           | 33 ± 39          | 0.089   | 26±34       | 5±3         | 0.072   |
| IL-5                       | 235±127          | 250 ± 206        | 0.860   | 277±275     | 148±129     | 0.174   |
| IL-6                       | 60312±0          | 59356 ± 2868     | 0.362   | 12015±13047 | 7260± 0978  | 0.366   |
| IL-7                       | 13±1             | 15 ± 5           | 0.171   | 15±5        | 21±14       | 0.201   |
| IL-9                       | 1090±211         | 1075 ± 374       | 0.916   | 1029±459    | 1036±546    | 0.973   |
| IL-10                      | 8464±2237        | 13851 ± 1022     | 0.141   | 7776±9204   | 2395±2879   | 0.093   |
| IL-12p40                   | 96±0             | 96 ± 0           | -       | 106±32      | 96±0        | 0.325   |
| IL-12p70                   | 224±66           | 240 ± 101        | 0.695   | 81±46       | 67±37       | 0.458   |
| IL-13                      | 394±115          | 350 ± 150        | 0.485   | 100±64      | 54±14       | 0.042*  |
| IL-15                      | 778±202          | 741 ± 340        | 0.777   | 657±449     | 439±226     | 0.166   |
| IL-17                      | 348±200          | 257 ± 234        | 0.380   | 167±175     | 90±114      | 0.231   |
| CXCL10 (IP-10)             | 6302±2910        | 7069 ± 3096      | 0.586   | 4606±4482   | 3250±2585   | 0.395   |
| CXCL1 (KC)                 | <i>saturated</i> | <i>Saturated</i> | -       | 51166±30246 | 49483±29880 | 0.8969  |
| CCL2 (MCP-1)               | 16807±10387      | 11015±7133       | 0.170   | 10596±11652 | 7039±6997   | 0.3957  |
| CCL3 (MIP-1α)              | 2298±803         | 2431±1016        | 0.757   | 1994±1999   | 1314±1042   | 0.3292  |
| CCL4 (MIP-1β)              | 8699±4070        | 9604±5346        | 0.685   | 5518±6511   | 3662±3511   | 0.420   |
| CXCL2 (MIP-2)              | 69837±11973      | 69321±10892      | 0.922   | 4120±34993  | 3083±30346  | 0.466   |
| CCL5 (RANTES)              | 269±82           | 262±66           | 0.839   | 161±142     | 111±61      | 0.303   |
| TNF-α                      | 247±70           | 245±85           | 0.970   | 154±151     | 110±89      | 0.422   |

Mean +/- SD. p values T-tests within Strains, i.e. Cre only and SkmIL-6, Vehicle vs. Ralox, n = 8-11 per group

**Table S3 – Circulatory cytokine/chemokine concentrations for Male mice at 3h post septic shock.**

| Cytokine/Chemokine (pg/ml) | CRE           |               |         | skmIL-6       |               |         |
|----------------------------|---------------|---------------|---------|---------------|---------------|---------|
|                            | Vehicle       | Raloxifene    | p-value | Vehicle       | Raloxifene    | p-value |
| GM-CSF                     | 305 ± 86      | 302 ± 112     | 0.952   | 113 ± 33      | 137 ± 56      | 0.244   |
| IFN-γ                      | 10 ± 1        | 16 ± 9        | 0.099   | 10 ± 2        | 11 ± 2        | 0.221   |
| IL-1 α                     | 536 ± 200     | 642 ± 180     | 0.241   | 456 ± 168     | 483 ± 200     | 0.746   |
| IL-1β                      | 133 ± 79      | 140 ± 101     | 0.869   | 38 ± 47       | 70 ± 103      | 0.371   |
| IL-2                       | 34 ± 16       | 46 ± 30       | 0.282   | 11 ± 1        | 26 ± 27       | 0.070   |
| IL-4                       | 4 ± 9         | 4 ± 1         | 0.187   | 4 ± 10        | 17 ± 45       | 0.329   |
| IL-5                       | 155 ± 86      | 158 ± 79      | 0.951   | 90 ± 106      | 127 ± 167     | 0.540   |
| IL-6                       | 58433 ± 5940  | 57280 ± 5968  | 0.678   | 3956 ± 6932   | 7351 ± 13308  | 0.461   |
| IL-7                       | 14 ± 5        | 16 ± 4        | 0.556   | 12 ± 0        | 12 ± 0        | -       |
| IL-9                       | 765 ± 133     | 1064 ± 369    | 0.028*  | 787 ± 342     | 793 ± 294     | 0.964   |
| IL-10                      | 4372 ± 3131   | 4347 ± 3848   | 0.987   | 761 ± 1079    | 1099 ± 1777   | 0.595   |
| IL-12p40                   | 96 ± 0        | 96 ± 0        | -       | 103 ± 24      | 96 ± 0        | 0.329   |
| IL-12p70                   | 200 ± 66      | 231 ± 83      | 0.385   | 42 ± 15       | 79 ± 70       | 0.102   |
| IL-13                      | 353 ± 98      | 358 ± 120     | 0.914   | 51 ± 19       | 63 ± 41       | 0.413   |
| IL-15                      | 637 ± 193     | 798 ± 289     | 0.167   | 251 ± 54      | 395 ± 178     | 0.01*   |
| IL-17                      | 457 ± 366     | 431 ± 325     | 0.869   | 102 ± 186     | 137 ± 262     | 0.722   |
| CXCL10 (IP-10)             | 5044 ± 1992   | 5613 ± 2447   | 0.583   | 2675 ± 1710   | 1925 ± 1489   | 0.286   |
| CXCL1 (KC)                 | 71887 ± 9881  | 75012 ± 0     | 0.357   | 44982 ± 30589 | 38918 ± 29314 | 0.640   |
| CCL2 (MCP-1)               | 12502 ± 6347  | 13133 ± 8048  | 0.850   | 6259 ± 7248   | 4499 ± 6033   | 0.542   |
| CCL3 (MIP-1α)              | 1813 ± 602    | 2083 ± 971    | 0.470   | 674 ± 539     | 694 ± 723     | 0.942   |
| CCL4 (MIP-1β)              | 6380 ± 2916   | 6925 ± 4006   | 0.737   | 1637 ± 1355   | 1716 ± 2345   | 0.924   |
| CXCL2 (MIP-2)              | 54153 ± 19526 | 61998 ± 15696 | 0.351   | 24494 ± 26134 | 19522 ± 27673 | 0.669   |
| CCL5 (RANTES)              | 210 ± 29      | 233 ± 71      | 0.361   | 86 ± 47       | 92 ± 47       | 0.745   |
| TNF-α                      | 246 ± 69      | 249 ± 94      | 0.937   | 93 ± 119      | 65 ± 57       | 0.489   |

Mean +/- SD. p values T-tests within Strains, i.e. Cre only and SkmIL-6, Vehicle vs. Ralox, n = 8-11 per group

# Supplement Figure S1

## SkmlL-6 Strain: Blood Leukocytes

□ skmlL-6 strain cntrl  
 ■ skmlL-6KD

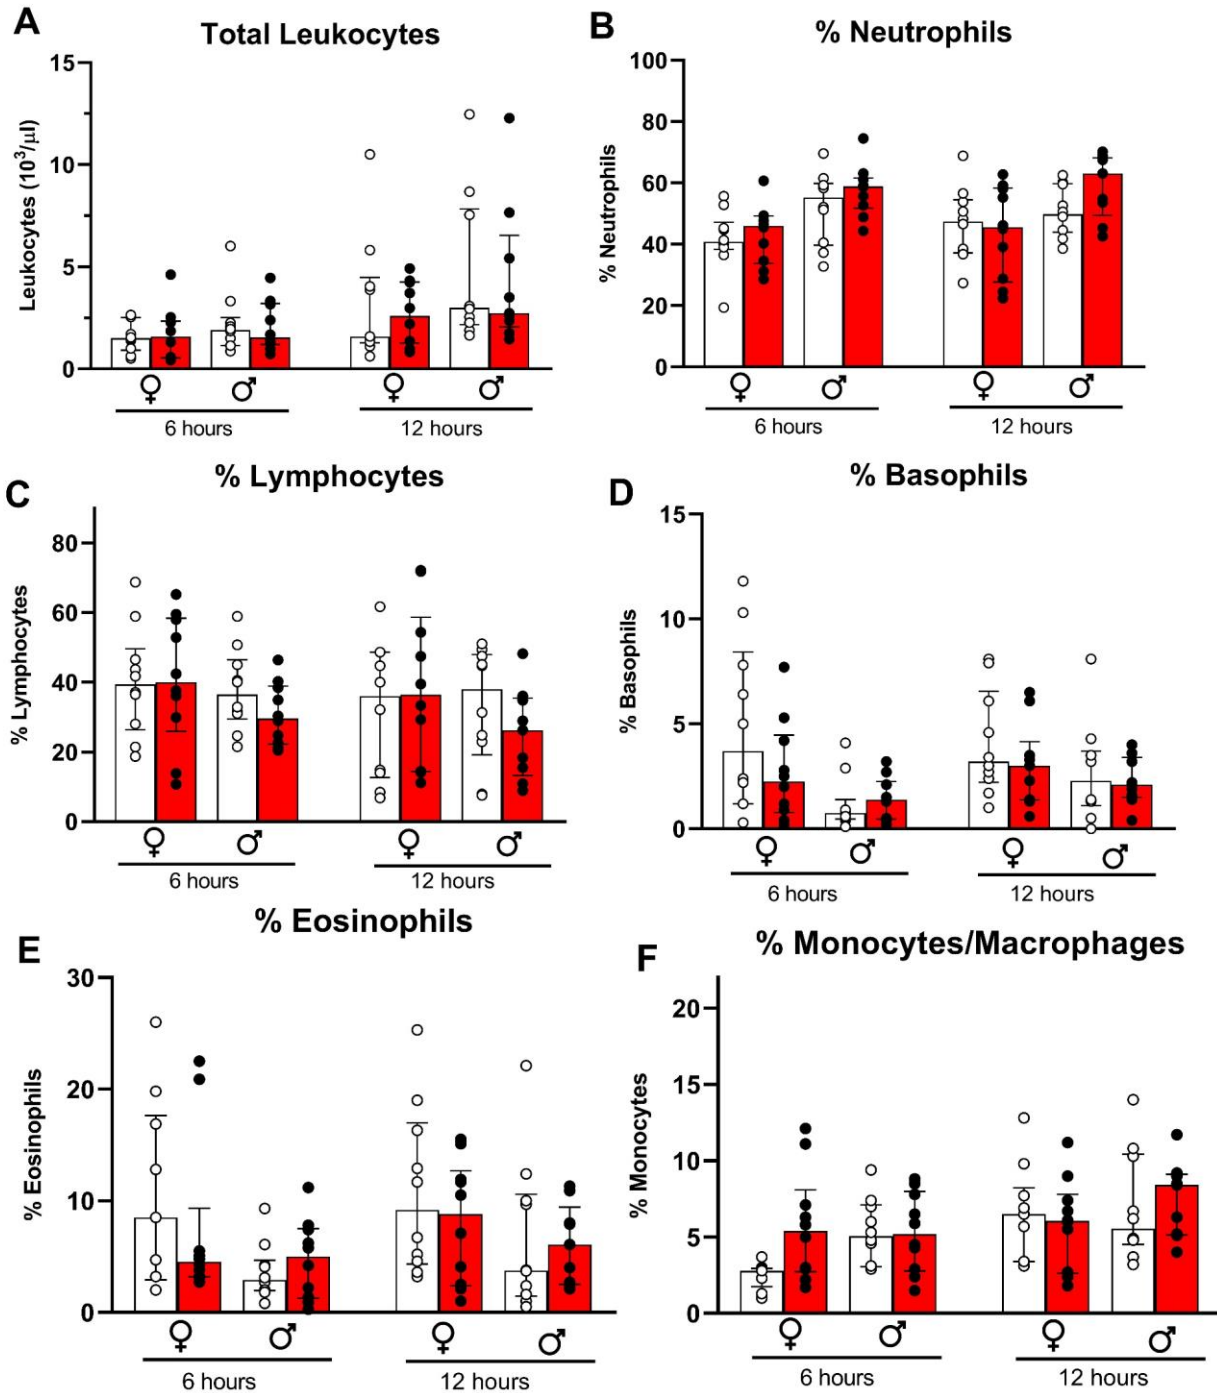

**Figure S1. Blood leukocyte differential counts SkmlL-6 mice.** White bars: skmlL-6 (vehicle treated/control) Closed bars skmlL-6KD (raloxifene treated) at 6 and 12 hours post EHS. (Medians +/- 25-75% quartiles).

## Supplemental Figure S2

### CRE-Mouse Strain: Peritoneal Leukocytes

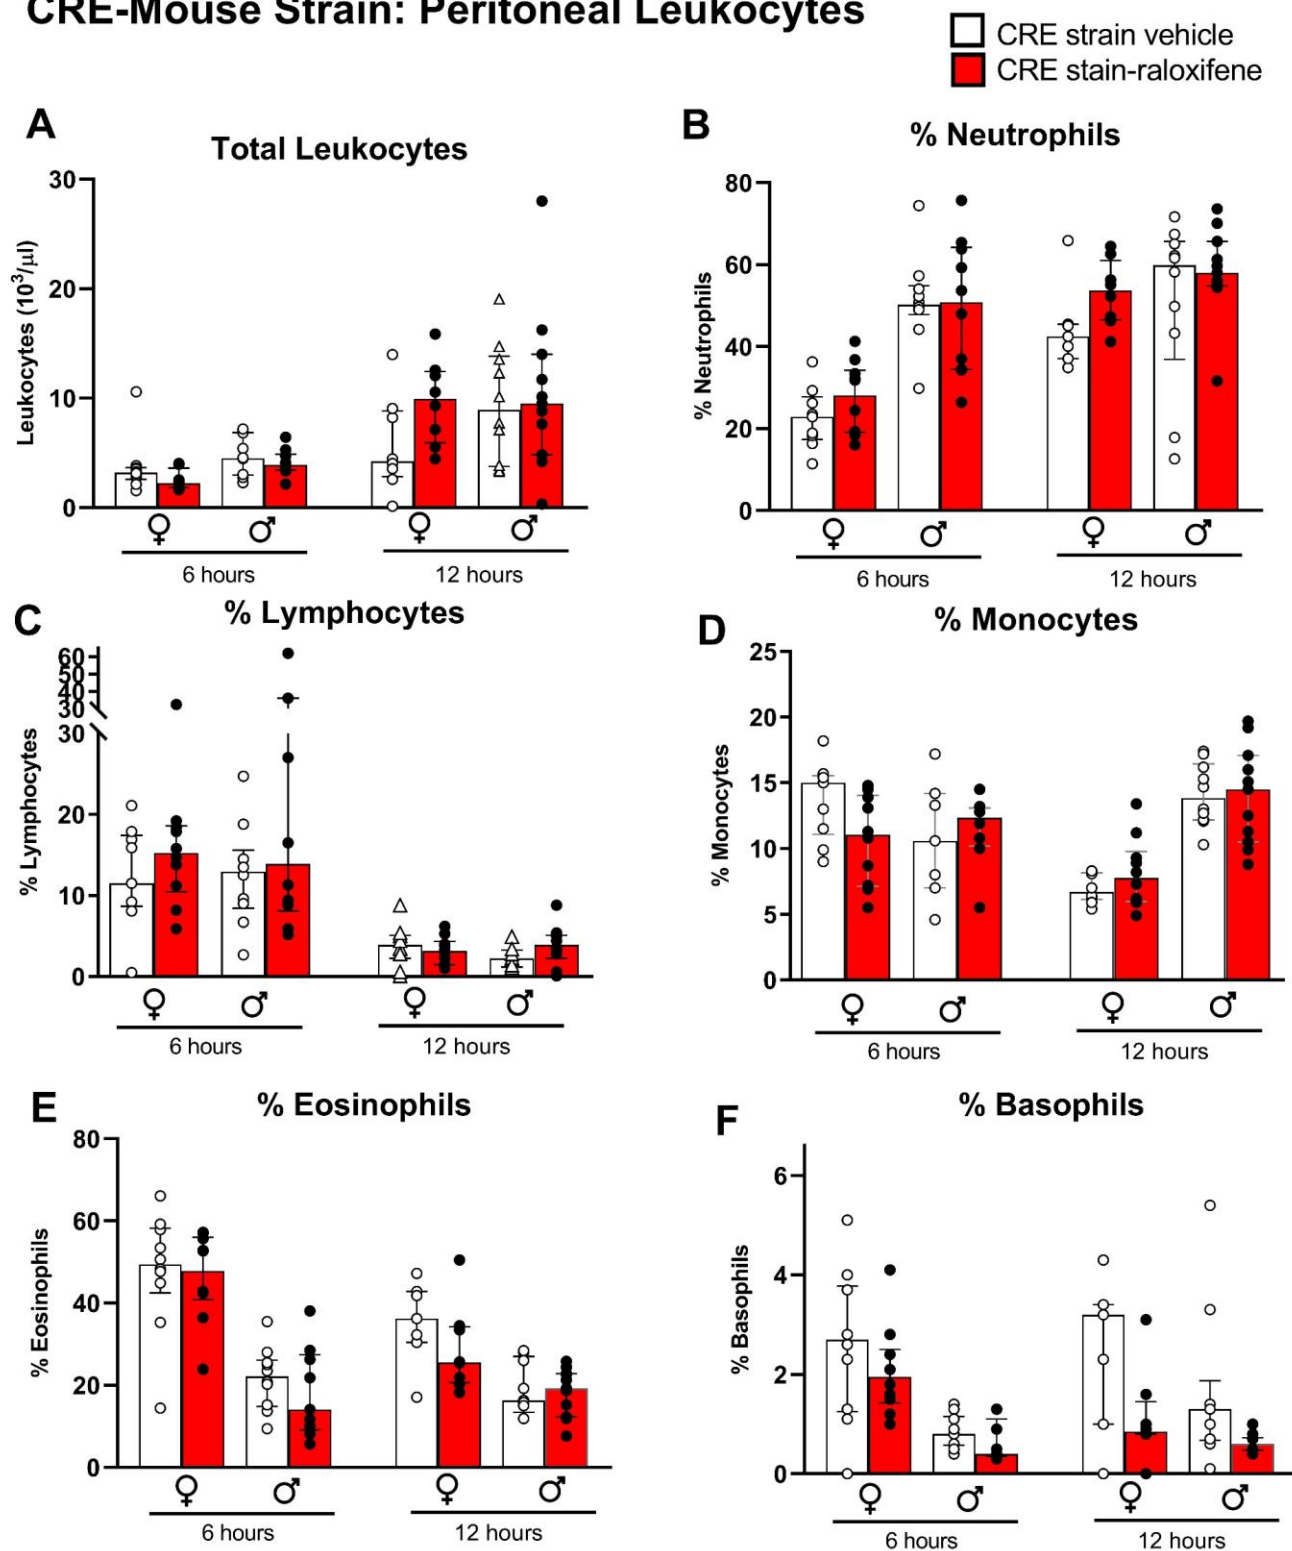

**Figure S2. Peritoneal leukocyte differential counts in CRE mice.** Open bars: CRE-mice (vehicle treated) against, Closed bar: CRE mic (raloxifene treated) at 6 and 12 hours post EHS. Median +/- 25-75% quartiles.

# Supplemental Figure S3

## Male and Female Plasma Cytokines: SkmIL-6 mice (6 & 12 h)

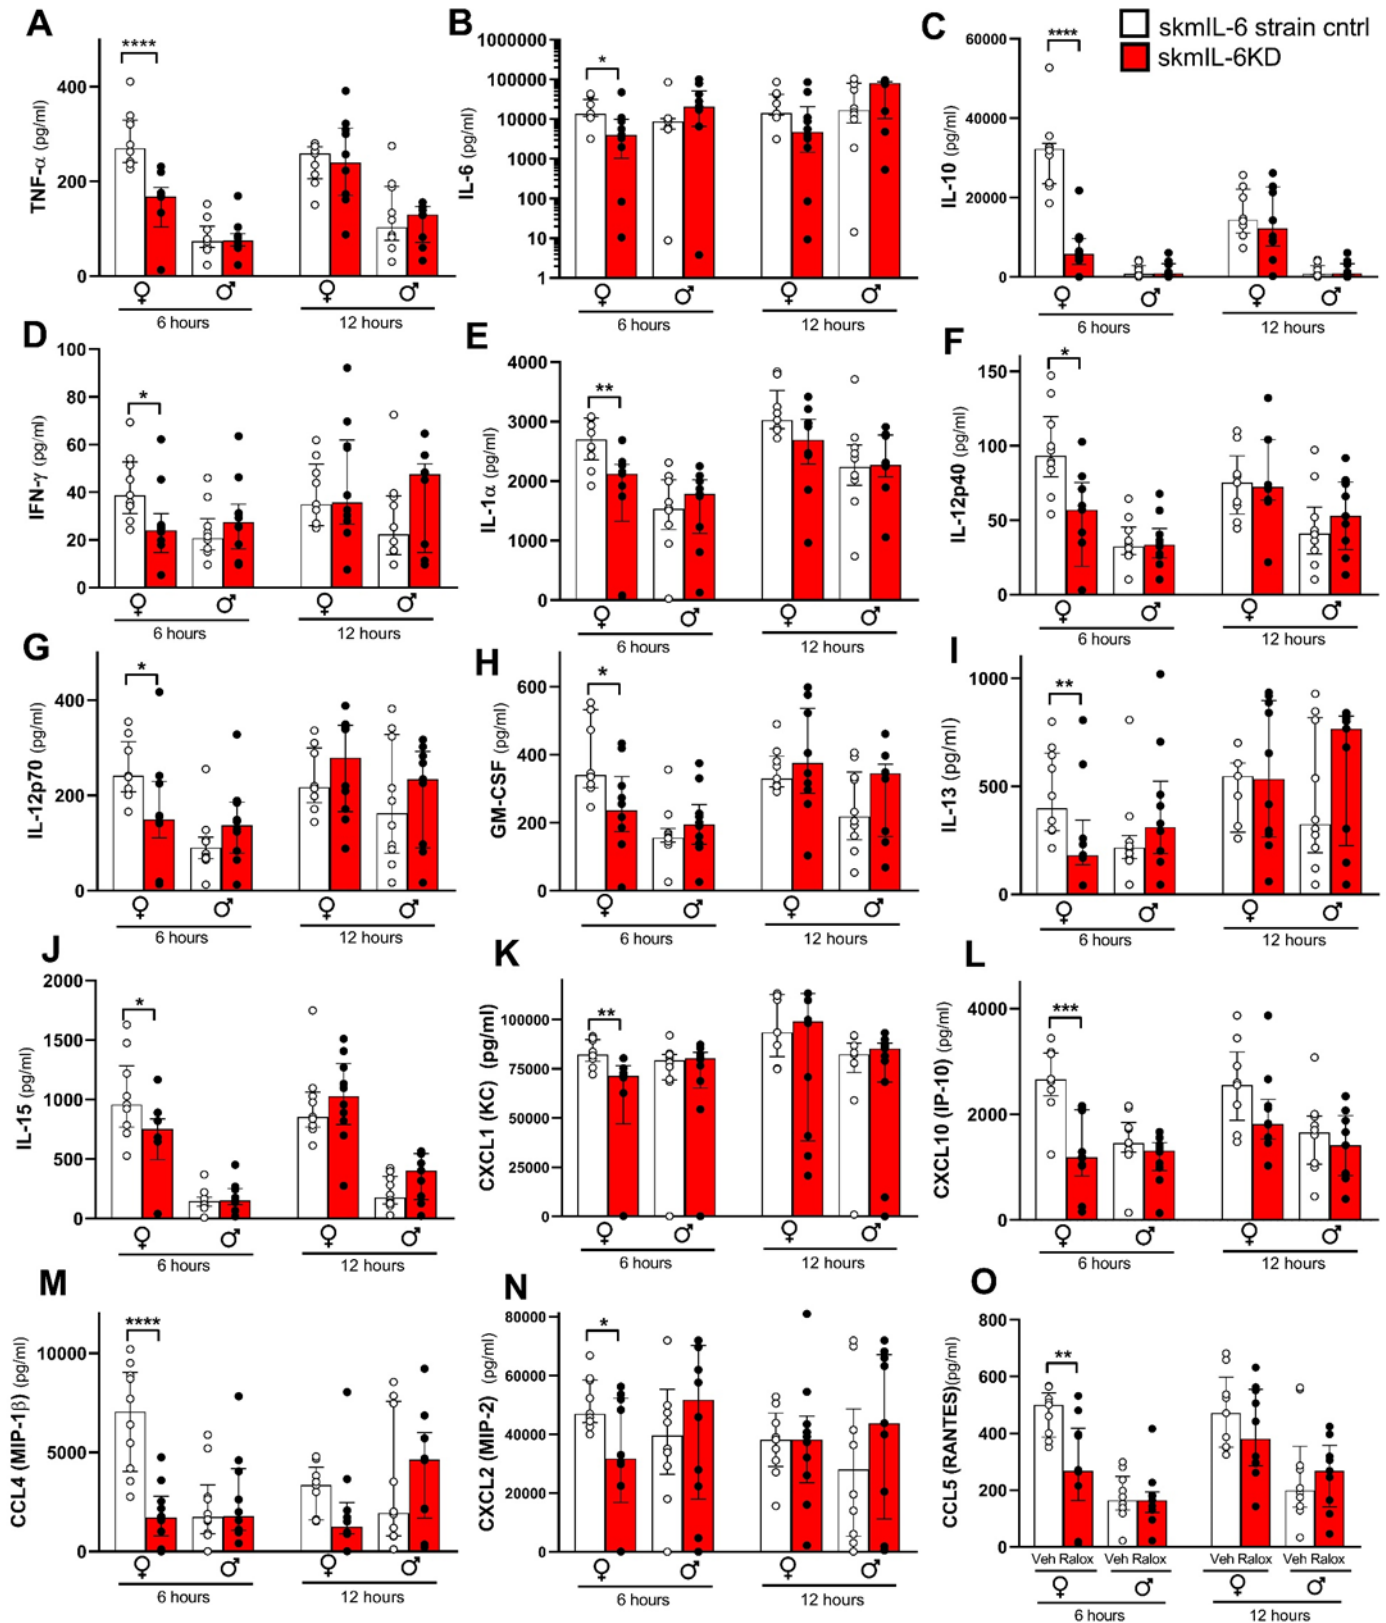

**Figure S3. Effects of skmIL-6KD on circulating cytokines** White bars = SkmIL-6KD strain match control. Red Bars = SkmIL-6 KD. Time points: 6 and 12 hours post cecal slurry. Following ANOVA, groups were tested by orthogonal comparisons within sex and strain matched controls. \* =  $P < 0.05$ , \*\* =  $P < 0.01$ .  $N = 9-10$  in each group. Data expressed as medians  $\pm 25-75\%$  quartiles.

# Supplemental Figure S4

## Male and Female Plasma Cytokines: Cre mice (6 & 12 h)

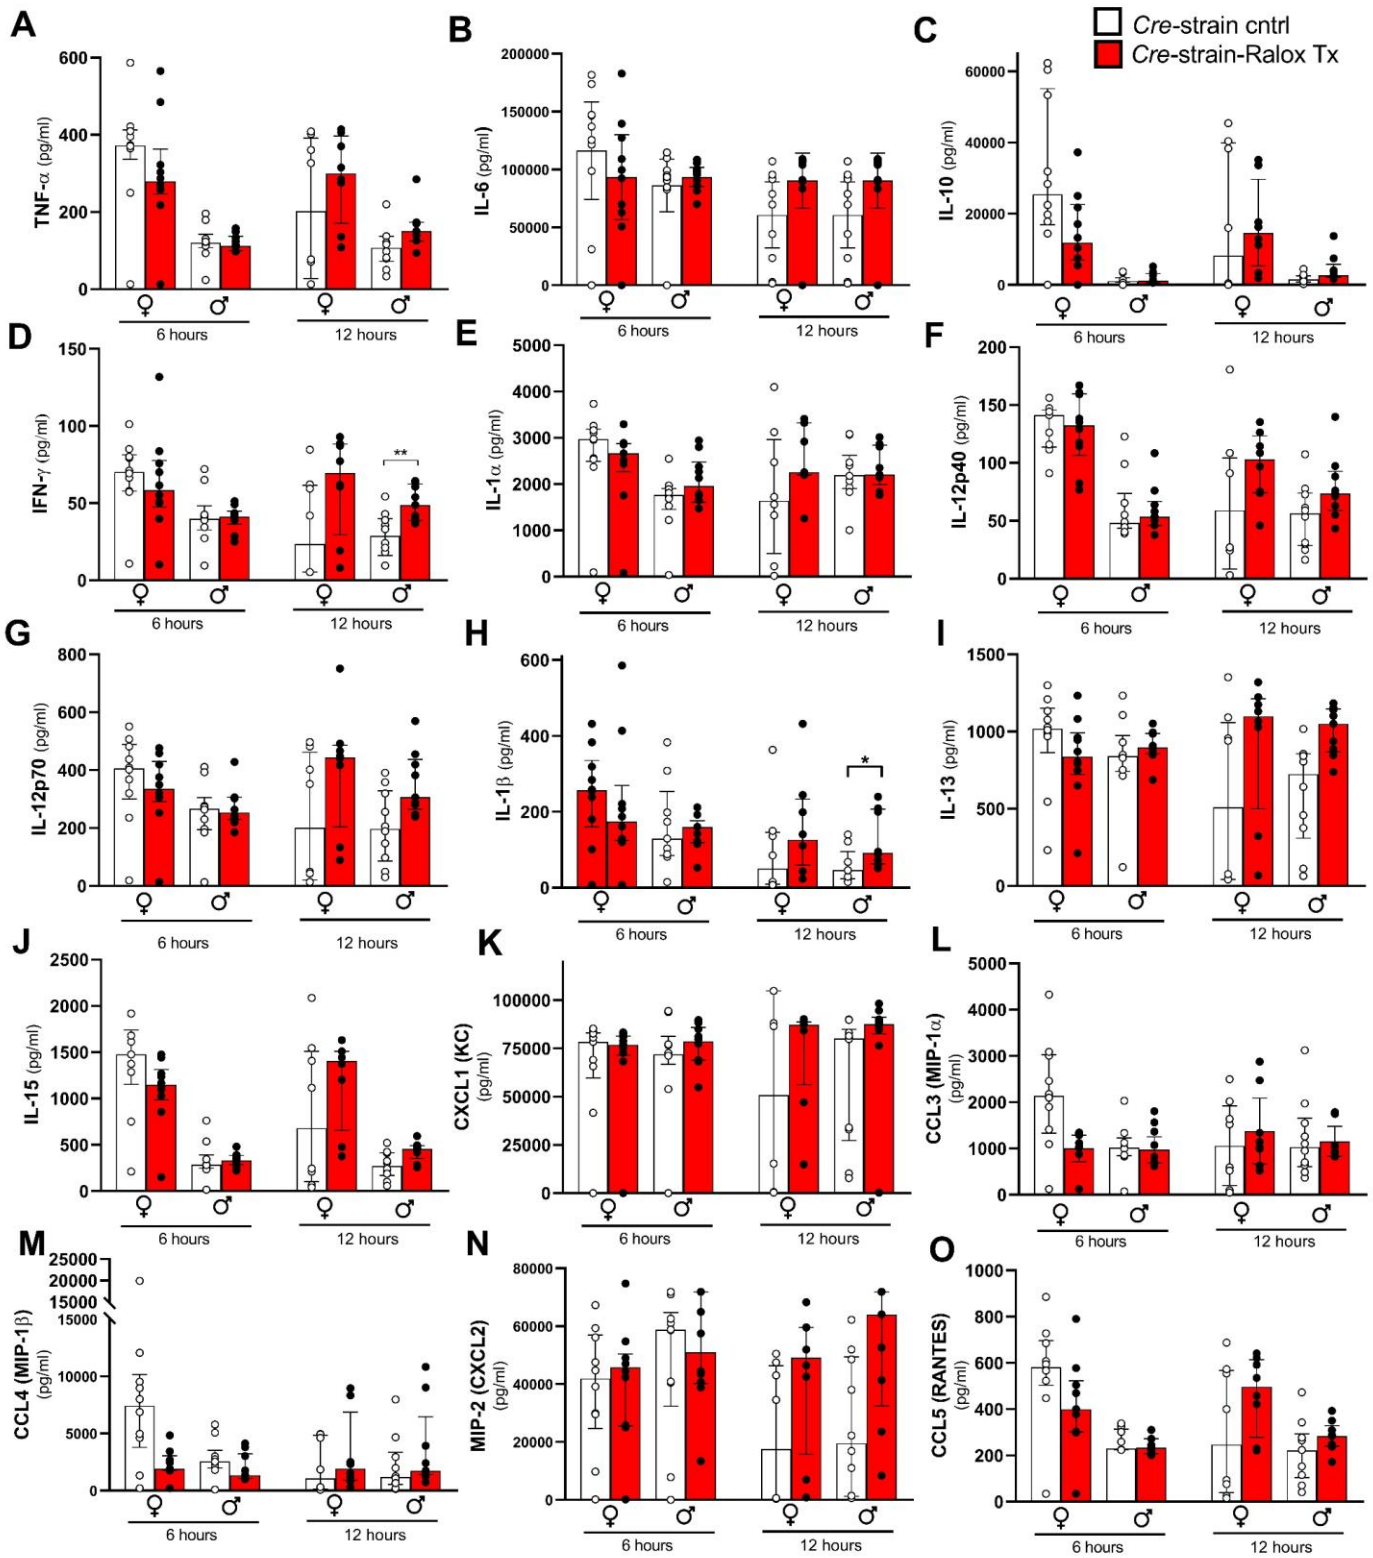

**Fig. S4. CRE mice, effects of CRE induction with raloxifene on circulating cytokines/chemokines.** White bars = control CRE mice (vehicle treated); Red bars = CRE mice treated with raloxifene. Time points: 6 and 12 hours post cesal slurry. Following ANOVA, groups were tested by orthogonal comparisons within sex and strain matched controls. \* =  $P < 0.05$ , \*\* =  $P < 0.01$ .  $N = 9-10$  in each group. Medians  $\pm$  25-75% quartiles.
